# Supplementary material for: MetAnnotate: function-specific taxonomic profiling and comparison of metagenomes
Source: PubMed Central journal article supplement (PMC4636000; doi:10.1186/s12915-015-0195-4), 2015-11-05

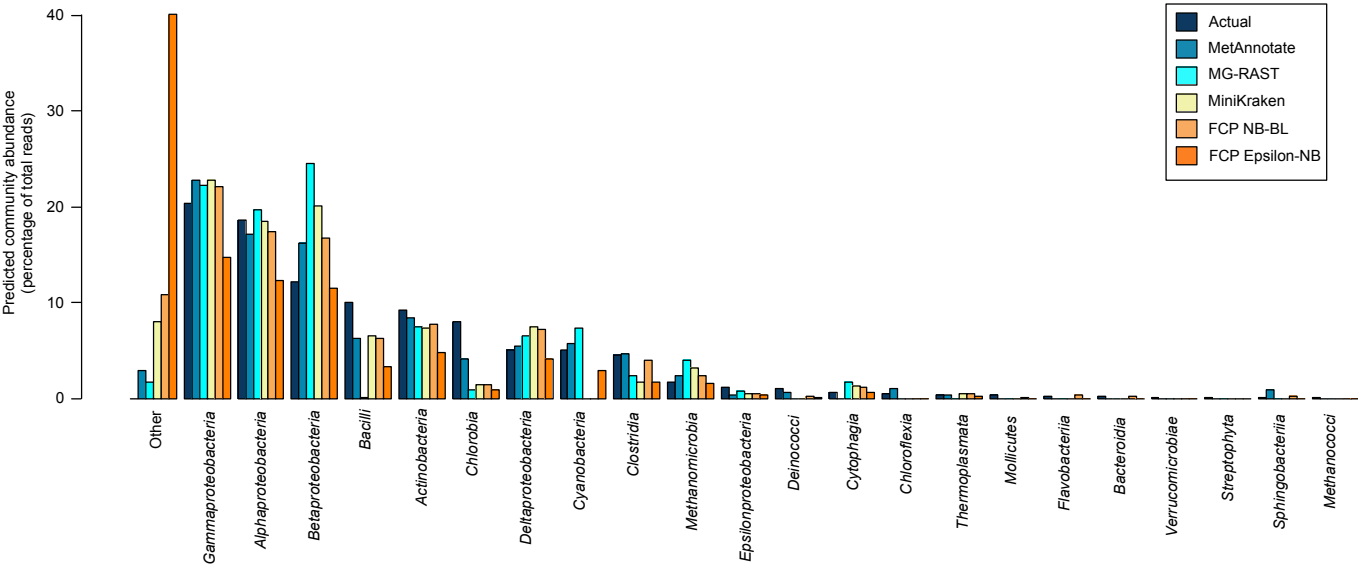

Supplement: 12915_2015_195_MOESM1_ESM.pdf [file 12915_2015_195_MOESM1_ESM.pdf]
